# Supplementary material for: Effect of aging on acute pancreatitis through gut microbiota
Source: Frontiers journal article supplement (doi:10.3389/fmicb.2022.897992), 2022-07-28
Supplement: Data_Sheet_1.PDF [file Data_Sheet_1.PDF]

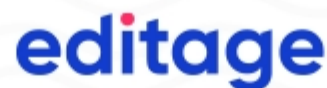

# Editing Certificate

This document certifies that the manuscript listed below has been edited to ensure language and grammar accuracy and is error free in these aspects. The logical presentation of ideas and the structure of the paper were also checked during the editing process. The edit was performed by professional editors at Editage, a division of Cactus Communications. The sections titled references were not edited by Editage upon the author's request.

The author's core research ideas were not altered during the editing process. Editage guarantees the quality of editing with the assumption that our suggested changes have been accepted and the edited text has not been altered without the knowledge of our editors.

## MANUSCRIPT TITLE

**Aging affects acute pancreatitis through gut microbiota by regulating antimicrobial peptides**

## AUTHORS

**Hui Jing**

## ISSUED ON

**March 03, 2022**

## JOB CODE

**EUHJU\_1**

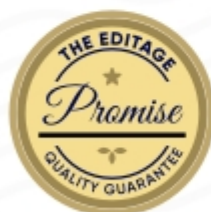

*Vikas Narang*

**Vikas Narang**  
Chief Operating Officer - Editage

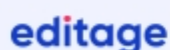

Editage, a brand of Cactus Communications, offers professional English language editing and publication support services to authors engaged in over 1300 areas of research. Through its community of experienced editors, which includes doctors, engineers, published scientists, and researchers with peer review experience, Editage has successfully helped authors get published in internationally reputed journals. Authors who work with Editage are guaranteed excellent language quality and timely delivery.

## GLOBAL :

+1(833) 979-0061 | [request@editage.com](mailto:request@editage.com)

## CHINA :

400-120-3020 | [fabiao@editage.cn](mailto:fabiao@editage.cn)

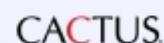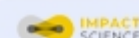

[impact.science](https://impact.science)

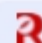

[researcher.life](https://researcher.life)

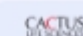

[lifesciences.cactusglobal.com](https://lifesciences.cactusglobal.com)
